# Supplementary material
Source: PubMed Central journal article supplement (PMC3214629)
Supplement: NIHMS328292-supplement-1_si_001.pdf [file NIHMS328292-supplement-1_si_001.pdf]

## Supplemental data:

**Figure S1, related to Figure 1.** The high resolution ESI-MS spectrum of the  $[M - H]^-$  ions of sulfolipids of *M. tuberculosis* H37Rv grown in modified Wong-Weinzirl broth. The spectrum was obtained with an Orbitrap Velos ion-trap instrument. The high resolution ( $R=100,000$ ) partially separated the SL-I (monoisotopic ions marked with “\*”) class from SL-II (monoisotopic ions marked with “▼”), which is again the principal sulfolipid class. However, the base peak shifts 56 Da (from  $m/z$  2459 to  $m/z$  2515), as compared to Figure 2), indicating that length of the hydroxyphthioceranoyl substituents of the sulfolipids changes dependent on the growth condition.

Figure S1

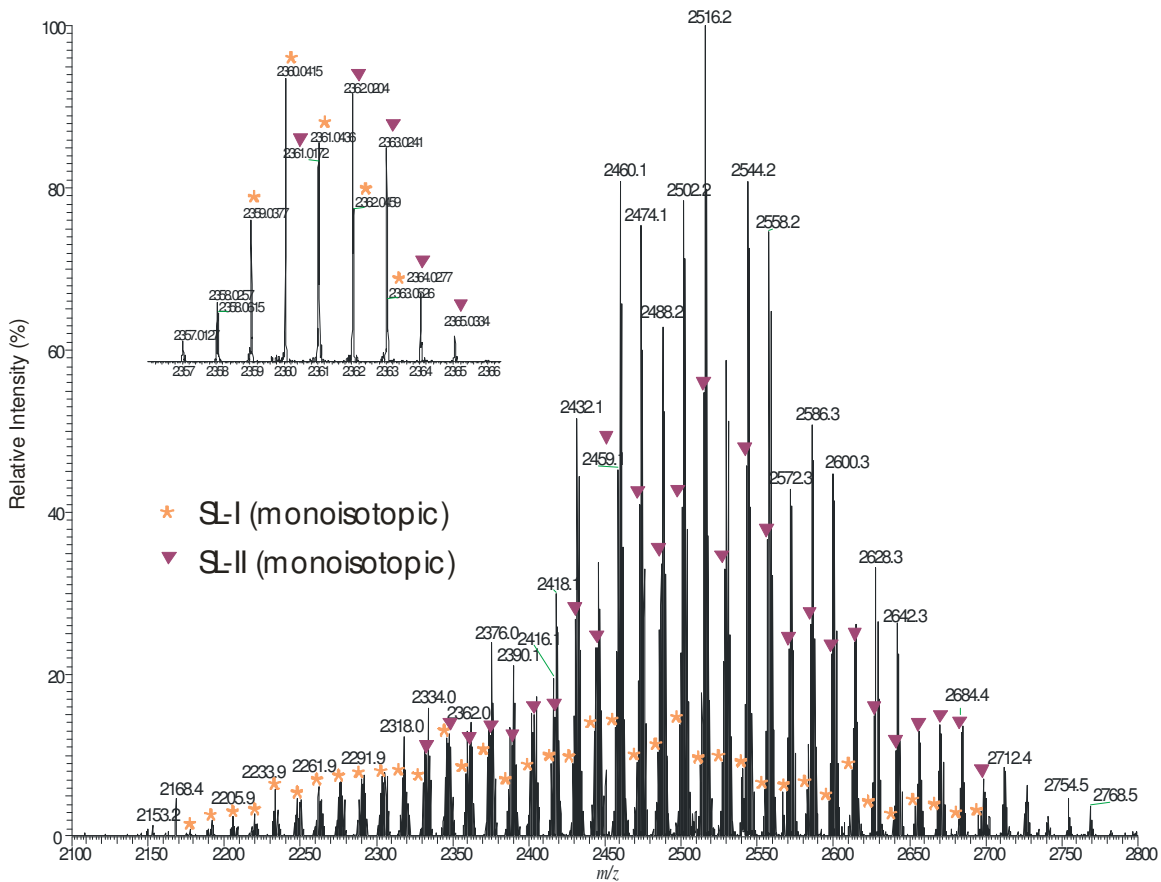

**Figure S2, related to Figure 2.** The MS<sup>2</sup> spectrum of the ion at m/z 2122.8 (a), its MS<sup>3</sup> spectra of the ion of m/z 1356 (2122 → 1356) (b), and of the ion at m/z 1384 (2123 → 1384) (c). The m/z 2122 represents the lightest SL-II that was characterized

Figure S2

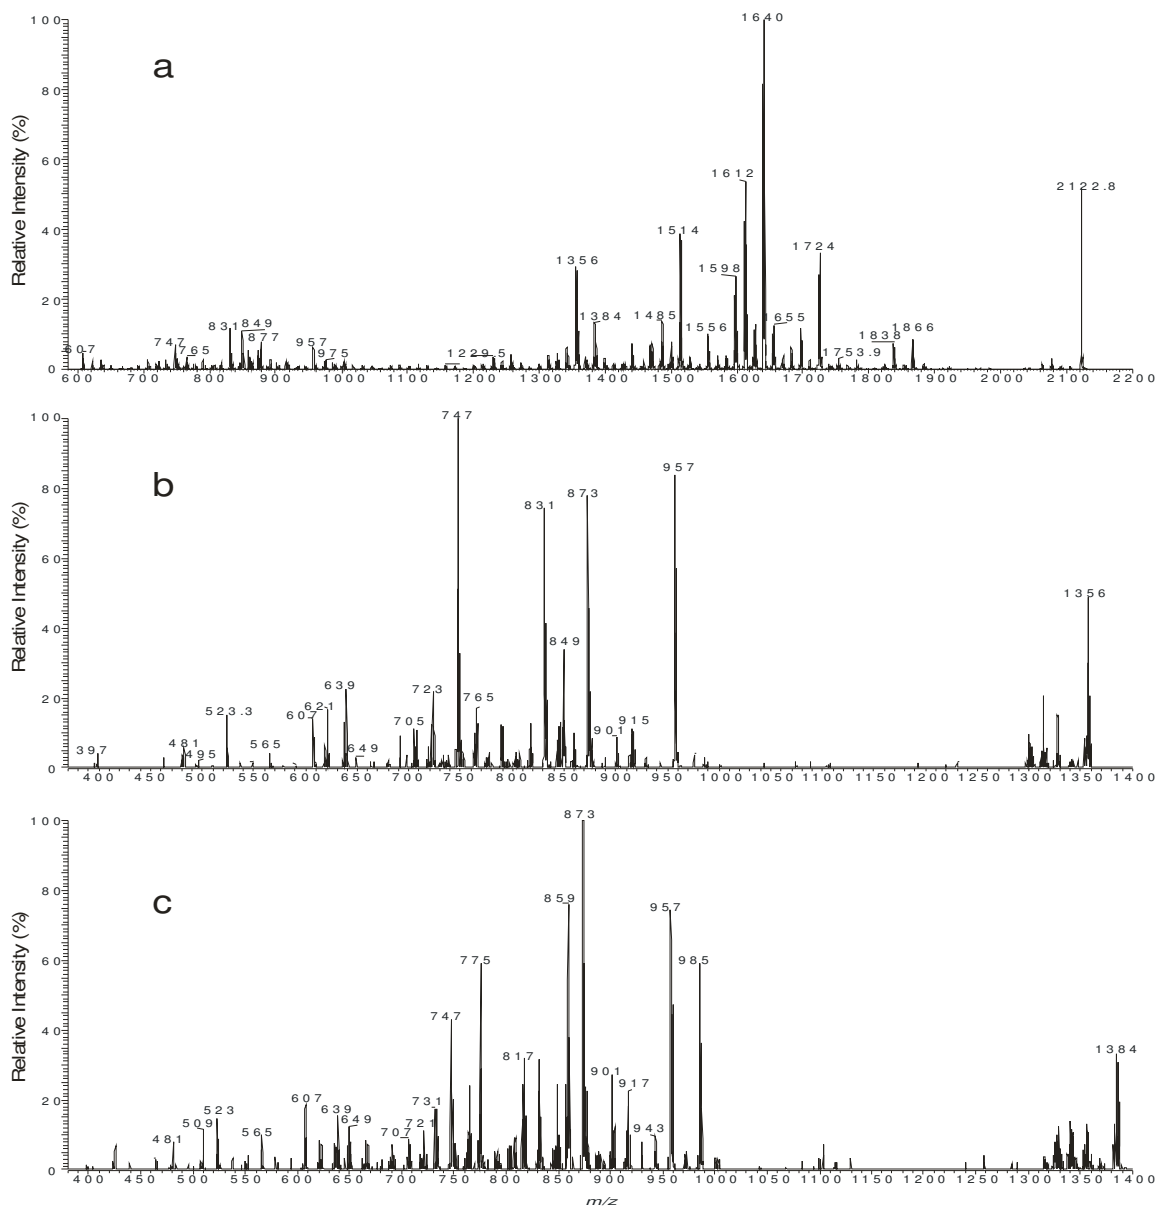

**Figure S3, related to Figure 3.** The MS<sup>2</sup> spectrum of the ion at m/z 2795.5 (a), its MS<sup>3</sup> spectra of the ion of m/z 1776 (2795 → 1776) (b), and of the ion at 1818 (2795 → 1818) (c). The ion of m/z 2795 represents the heaviest SL-II that was characterized in this study.

Figure S3

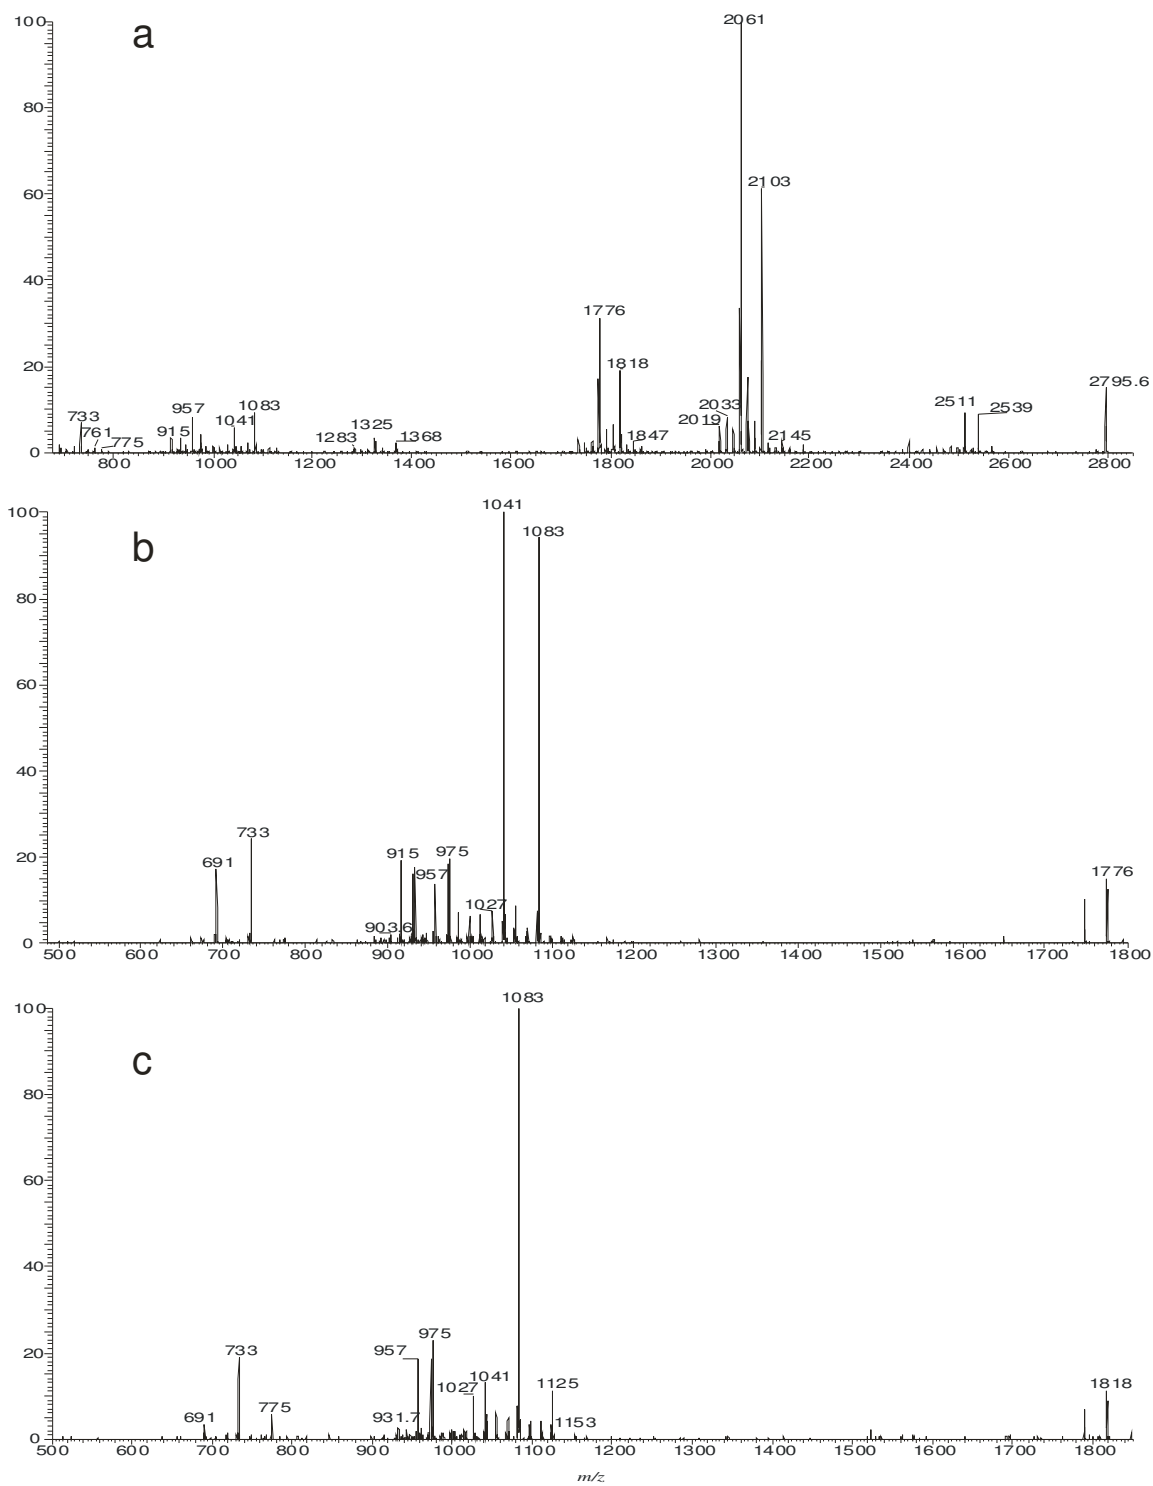

**Table S1, related to Figure 2.**

**Table S1. The elemental compositions (deduced from accurate mass measurements) of the [M -H]<sup>-</sup> ions of the SLs and the assigned major structures**

| measured m/z (Da) | calculated m/z (Da) | Composition     | deviation (mmu) | Relative Intensity (%) | species | *major structures                                                                                                          |
|-------------------|---------------------|-----------------|-----------------|------------------------|---------|----------------------------------------------------------------------------------------------------------------------------|
| 2188.8723         | 2188.8714           | C133 H255 O19 S | 0.92            | 0.75                   | SL-I'   |                                                                                                                            |
| 2190.8502         | 2190.8467           | C132 H253 O20 S | 0.45            | 0.92                   | SL-I    | 18:0, hC <sub>33</sub> , hC <sub>40</sub> , C <sub>31</sub>                                                                |
| 2204.8644         | 2204.8663           | C133 H255 O20 S | -1.90           | 1.05                   | SL-I    |                                                                                                                            |
| 2218.8828         | 2218.8819           | C134 H257 O20 S | 0.86            | 0.75                   | SL-I    |                                                                                                                            |
| 2220.8600         | 2220.8812           | C133 H255 O21 S | -1.21           | 0.82                   | SL-II   | 16:0, hC <sub>40</sub> , hC <sub>40</sub> , hC <sub>25</sub> ;16:0, hC <sub>40</sub> , hC <sub>31</sub> , hC <sub>34</sub> |
| 2232.8956         | 2232.8976           | C135 H259 O20 S | -2.00           | 3.27                   | SL-I    | 16:0, hC <sub>40</sub> , hC <sub>34</sub> , C <sub>33</sub> ;18:0, hC <sub>40</sub> , hC <sub>34</sub> , C <sub>31</sub>   |
| 2234.8776         | 2234.8769           | C134 H257 O21 S | 0.74            | 1.63                   | SL-II   |                                                                                                                            |
| 2246.9155         | 2246.9132           | C136 H261 O20 S | 2.25            | 2.65                   | SL-I    |                                                                                                                            |
| 2248.8915         | 2248.8925           | C135 H259 O21 S | -1.01           | 1.92                   | SL-II   | 18:0, hC <sub>31</sub> , hC <sub>40</sub> , hC <sub>34</sub> ;16:0, hC <sub>33</sub> , hC <sub>40</sub> , hC <sub>34</sub> |
| 2258.9494         | 2258.9496           | C138 H265 O19 S | -0.23           | 0.70                   | SL-I'   |                                                                                                                            |
| 2260.9286         | 2260.9289           | C137 H263 O20 S | -0.30           | 2.14                   | SL-I    | 18:0, hC <sub>40</sub> , hC <sub>34</sub> , C <sub>33</sub>                                                                |
| 2262.9109         | 2262.9082           | C136 H261 O21 S | 2.74            | 2.88                   | SL-II   |                                                                                                                            |
| 2272.9639         | 2272.9653           | C139 H267 O19 S | -1.38           | 1.32                   | SL-I'   | 18:0, hC <sub>40</sub> , hC <sub>33</sub> , hC <sub>31</sub>                                                               |
| 2274.9451         | 2274.9445           | C138 H265 O20 S | 0.55            | 4.84                   | SL-I    |                                                                                                                            |
| 2276.9229         | 2276.9238           | C137 H263 O21 S | -0.91           | 4.14                   | SL-II   | 18:0, hC <sub>40</sub> , hC <sub>34</sub> , hC <sub>31</sub>                                                               |
| 2288.9630         | 2288.9602           | C139 H267 O20 S | 2.80            | 4.52                   | SL-I    |                                                                                                                            |
| 2290.9396         | 2290.9395           | C138 H265 O21 S | 0.14            | 2.40                   | SL-II   | 16:0, hC <sub>40</sub> , hC <sub>40</sub> , hC <sub>30</sub> ;18:0, hC <sub>40</sub> , hC <sub>34</sub> , hC <sub>34</sub> |
| 2302.9750         | 2302.9758           | C140 H269 O20 S | -0.85           | 5.32                   | SL-I    |                                                                                                                            |
| 2304.9553         | 2304.9551           | C139 H267 O21 S | 0.19            | 5.47                   | SL-II   | 16:0, hC <sub>40</sub> , hC <sub>40</sub> , hC <sub>31</sub>                                                               |
| 2316.9897         | 2316.9915           | C141 H271 O20 S | -1.80           | 7.37                   | SL-I    | 18:0, hC <sub>40</sub> , hC <sub>40</sub> , C <sub>31</sub> ; 16:0, hC <sub>40</sub> , hC <sub>40</sub> , C <sub>33</sub>  |
| 2318.9724         | 2318.9708           | C140 H269 O21 S | 1.64            | 2.81                   | SL-II   |                                                                                                                            |
| 2329.0263         | 2329.0279           | C143 H275 O19 S | -1.58           | 0.88                   | SL-I'   |                                                                                                                            |
| 2331.0072         | 2331.0071           | C142 H273 O20 S | 0.05            | 6.58                   | SL-I    | 18:0, hC <sub>40</sub> , hC <sub>40</sub> , hC <sub>30</sub>                                                               |
| 2332.9870         | 2332.9864           | C141 H271 O21 S | 0.59            | 8.21                   | SL-II   |                                                                                                                            |
| 2343.0437         | 2343.0435           | C144 H277 O19 S | 0.17            | 0.99                   | SL-I'   | 18:0, hC <sub>40</sub> , hC <sub>40</sub> , hC <sub>31</sub>                                                               |
| 2345.0234         | 2345.0228           | C143 H275 O20 S | 0.60            | 7.26                   | SL-I    | 18:0, hC <sub>40</sub> , hC <sub>40</sub> , C <sub>33</sub>                                                                |
| 2347.0013         | 2347.0021           | C142 H273 O21 S | -0.76           | 7.15                   | SL-II   | 16:0, hC <sub>40</sub> , hC <sub>40</sub> , hC <sub>34</sub>                                                               |
| 2359.0380         | 2359.0384           | C144 H277 O20 S | -0.45           | 7.81                   | SL-I    | 18:0, hC <sub>40</sub> , hC <sub>40</sub> , C <sub>34</sub>                                                                |
| 2361.0171         | 2361.0177           | C143 H275 O21 S | -0.61           | 9.77                   | SL-II   | 18:0, hC <sub>40</sub> , hC <sub>40</sub> , hC <sub>33</sub>                                                               |
| 2373.0542         | 2373.0541           | C145 H279 O20 S | 0.10            | 9.67                   | SL-I    |                                                                                                                            |
| 2375.0337         | 2375.0334           | C144 H277 O21 S | 0.34            | 12.71                  | SL-II   | 18:0, hC <sub>40</sub> , hC <sub>40</sub> , hC <sub>34</sub>                                                               |
| 2387.0696         | 2387.0697           | C146 H281 O20 S | -0.15           | 5.86                   | SL-I    |                                                                                                                            |
| 2389.0494         | 2389.0490           | C145 H279 O21 S | 0.39            | 11.13                  | SL-II   | 16:0, hC <sub>40</sub> , hC <sub>43</sub> , hC <sub>34</sub>                                                               |
| 2401.0860         | 2401.0854           | C147 H283 O20 S | 0.60            | 7.94                   | SL-I    |                                                                                                                            |
| 2403.0656         | 2403.0647           | C146 H281 O21 S | 0.94            | 10.32                  | SL-II   | 18:0, hC <sub>40</sub> , hC <sub>42</sub> , hC <sub>34</sub>                                                               |
| 2415.0995         | 2415.1010           | C148 H285 O20 S | -1.55           | 9.04                   | SL-I    |                                                                                                                            |
| 2417.0794         | 2417.0080           | C147 H283 O21 S | -0.91           | 13.31                  | SL-II   | 18:0, hC <sub>40</sub> , hC <sub>40</sub> , hC <sub>37</sub>                                                               |
| 2429.1174         | 2429.1167           | C149 H287 O20 S | 0.70            | 8.99                   | SL-I    |                                                                                                                            |
| 2431.0957         | 2431.0960           | C148 H285 O21 S | -0.26           | 26.95                  | SL-II   | 16:0, hC <sub>40</sub> , hC <sub>40</sub> , hC <sub>40</sub>                                                               |
| 2443.1313         | 2443.1323           | C150 H289 O20 S | -1.05           | 13.30                  | SL-I    |                                                                                                                            |
| 2445.1123         | 2445.1116           | C149 H287 O21 S | 0.69            | 16.60                  | SL-II   | 16:0, hC <sub>40</sub> , hC <sub>40</sub> , hC <sub>41</sub>                                                               |
| 2457.1473         | 2457.1480           | C151 H291 O20 S | -0.70           | 13.45                  | SL-I    |                                                                                                                            |
| 2459.1273         | 2459.1273           | C150 H289 O21 S | 0.04            | 45.05                  | SL-II   | 18:0, hC <sub>40</sub> , hC <sub>40</sub> , hC <sub>40</sub> ;16:0, hC <sub>40</sub> , hC <sub>42</sub> , hC <sub>40</sub> |
| 2471.1631         | 2471.1636           | C152 H293 O20 S | -0.55           | 9.22                   | SL-I    |                                                                                                                            |
| 2473.1428         | 2473.1429           | C151 H291 O21 S | -0.11           | 41.14                  | SL-II   | 16:0, hC <sub>40</sub> , hC <sub>43</sub> , hC <sub>40</sub>                                                               |
| 2485.1790         | 2485.1793           | C153 H295 O20 S | -0.30           | 10.49                  | SL-I    |                                                                                                                            |
| 2487.1585         | 2487.1586           | C152 H293 O21 S | 0.06            | 33.62                  | SL-II   | 18:0, hC <sub>40</sub> , hC <sub>42</sub> , hC <sub>40</sub>                                                               |
| 2499.1939         | 2499.1949           | C154 H297 O20 S | -1.05           | 14.09                  | SL-I    |                                                                                                                            |
| 2501.1747         | 2501.1742           | C153 H295 O21 S | 0.49            | 40.90                  | SL-II   | 18:0, hC <sub>40</sub> , hC <sub>43</sub> , hC <sub>40</sub>                                                               |
| 2513.2097         | 2513.2106           | C155 H299 O20 S | -0.90           | 8.86                   | SL-I    |                                                                                                                            |
| 2515.1897         | 2525.1899           | C154 H297 O21 S | -0.16           | 49.31                  | SL-II   | 16:0, hC <sub>40</sub> , hC <sub>43</sub> , hC <sub>43</sub> ;16:0, hC <sub>40</sub> , hC <sub>46</sub> , hC <sub>40</sub> |
| 2527.2261         | 2527.2262           | C156 H301 O20 S | -0.15           | 9.09                   | SL-I    |                                                                                                                            |
| 2529.2056         | 2599.2055           | C155 H299 O21 S | 0.09            | 33.00                  | SL-II   | 18:0, hC <sub>40</sub> , hC <sub>43</sub> , hC <sub>42</sub>                                                               |
| 2541.2426         | 2541.2419           | C157 H303 O20 S | 0.70            | 8.50                   | SL-I    |                                                                                                                            |
| 2543.2208         | 2543.2212           | C156 H301 O21 S | -0.36           | 42.38                  | SL-II   | 18:0, hC <sub>40</sub> , hC <sub>43</sub> , hC <sub>43</sub> ;18:0, hC <sub>40</sub> , hC <sub>46</sub> , hC <sub>40</sub> |
| 2555.2565         | 2555.2575           | C158 H305 O20 S | -1.05           | 5.70                   | SL-I    |                                                                                                                            |
| 2557.2366         | 2557.2368           | C157 H303 O21 S | -0.21           | 34.97                  | SL-II   | 16:0, hC <sub>40</sub> , hC <sub>43</sub> , hC <sub>46</sub>                                                               |
| 2569.2693         | 2569.2372           | C159 H307 O20 S | -3.90           | 5.44                   | SL-I    |                                                                                                                            |
| 2571.2522         | 2571.2525           | C158 H305 O21 S | -0.26           | 23.54                  | SL-II   | 18:0, hC <sub>40</sub> , hC <sub>42</sub> , hC <sub>46</sub>                                                               |
| 2583.2872         | 2583.2888           | C160 H309 O20 S | -1.65           | 4.90                   | SL-I    |                                                                                                                            |
| 2585.2700         | 2585.2681           | C159 H307 O21 S | 1.89            | 22.92                  | SL-II   | 18:0, hC <sub>40</sub> , hC <sub>43</sub> , hC <sub>46</sub>                                                               |
| 2597.3047         | 2597.3045           | C161 H311 O20 S | 0.20            | 3.53                   | SL-I    |                                                                                                                            |
| 2599.2833         | 2599.2838           | C160 H309 O21 S | -0.46           | 22.49                  | SL-II   | 16:0, hC <sub>40</sub> , hC <sub>46</sub> , hC <sub>46</sub> ;16:0, hC <sub>43</sub> , hC <sub>43</sub> , hC <sub>46</sub> |
| 2611.3177         | 2611.3201           | C162 H313 O20 S | -2.45           | 2.30                   | SL-I    |                                                                                                                            |
| 2613.3009         | 2613.2994           | C161 H311 O21 S | 1.49            | 13.43                  | SL-II   | 18:0, hC <sub>40</sub> , hC <sub>46</sub> , hC <sub>45</sub> ;18:0, hC <sub>46</sub> , hC <sub>43</sub> , hC <sub>42</sub> |
| 2625.3322         | 2625.3358           | C163 H315 O20 S | -3.60           | 2.58                   | SL-I    |                                                                                                                            |
| 2627.3177         | 2627.3151           | C162 H313 O21 S | 2.64            | 14.88                  | SL-II   | 18:0, hC <sub>40</sub> , hC <sub>46</sub> , hC <sub>46</sub>                                                               |
| 2639.3490         | 2639.3151           | C164 H317 O20 S | -2.45           | 0.82                   | SL-I    |                                                                                                                            |
| 2641.3339         | 2641.3307           | C163 H315 O21 S | 3.19            | 10.55                  | SL-II   | 16:0, hC <sub>43</sub> , hC <sub>46</sub> , hC <sub>46</sub> ;18:0, hC <sub>46</sub> , hC <sub>43</sub> , hC <sub>44</sub> |
| 2653.3653         | 2653.3671           | C165 H319 O20 S | -1.80           | 1.21                   | SL-I    |                                                                                                                            |
| 2655.3466         | 2655.3464           | C164 H317 O21 S | 0.24            | 6.47                   | SL-II   | 18:0, hC <sub>43</sub> , hC <sub>46</sub> , hC <sub>46</sub>                                                               |
| 2669.3632         | 2669.3620           | C165 H319 O21 S | 1.19            | 8.02                   | SL-II   | 18:0, hC <sub>46</sub> , hC <sub>43</sub> , hC <sub>46</sub> ;18:0, hC <sub>46</sub> , hC <sub>46</sub> , hC <sub>49</sub> |
| 2683.3777         | 2683.3777           | C166 H321 O21 S | 0.04            | 6.09                   | SL-II   | 16:0, hC <sub>46</sub> , hC <sub>46</sub> , hC <sub>46</sub> ;16:0, hC <sub>43</sub> , hC <sub>46</sub> , hC <sub>49</sub> |
| 2697.3926         | 2697.3933           | C167 H323 O21 S | -0.71           | 3.00                   | SL-II   | 18:0, hC <sub>46</sub> , hC <sub>46</sub> , hC <sub>45</sub>                                                               |
| 2711.4094         | 2711.4090           | C168 H325 O21 S | 0.44            | 3.92                   | SL-II   | 18:0, hC <sub>46</sub> , hC <sub>46</sub> , hC <sub>46</sub>                                                               |
| 2725.4262         | 2725.4246           | C169 H327 O21 S | 1.59            | 2.87                   | SL-II   | 16:0, hC <sub>46</sub> , hC <sub>46</sub> , hC <sub>49</sub> ;16:0, hC <sub>43</sub> , hC <sub>49</sub> , hC <sub>49</sub> |
| 2739.4379         | 2739.4402           | C170 H329 O21 S | -2.36           | 0.80                   | SL-II   | 18:0, hC <sub>46</sub> , hC <sub>46</sub> , hC <sub>48</sub>                                                               |
| 2753.4550         | 2753.4559           | C171 H331 O21 S | -0.91           | 2.00                   | SL-II   | 18:0, hC <sub>46</sub> , hC <sub>46</sub> , hC <sub>49</sub>                                                               |
| 2767.4740         | 2767.4716           | C172 H333O21 S  | 2.44            | 0.50                   | SL-II   | 16:0, hC <sub>46</sub> , hC <sub>49</sub> , hC <sub>49</sub>                                                               |

\*Only major structures are listed; structures of SL-I and SL-I' not complete
